# Supplementary material for: Clock-dependent and system-driven oscillators interact in the suprachiasmatic nuclei to pace mammalian circadian rhythms
Source: PubMed Central journal article supplement (PMC5653358; doi:10.1371/journal.pone.0187001), 2017-10-23

## Virgin

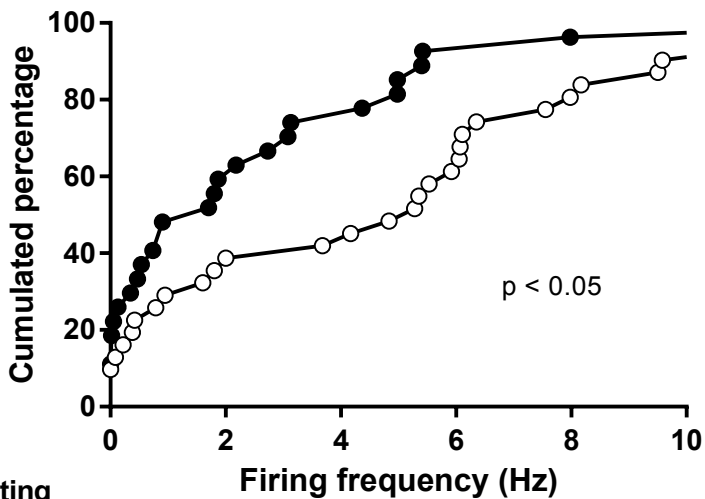

## Lactating

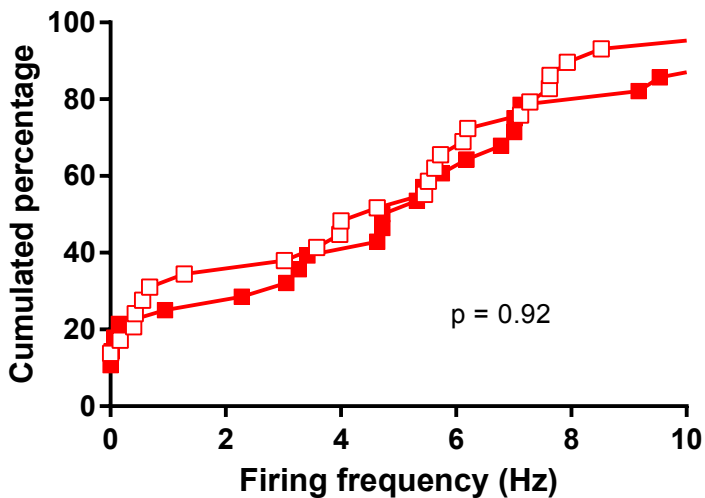

Supplement: pone.0187001.s001.pdf [file pone.0187001.s001.pdf]
